# Supplementary material for: The Role of PDE11A4 in Social Isolation-Induced Changes in Intracellular Signaling and Neuroinflammation
Source: Front Pharmacol. 2021 Nov 23;12:749628. doi: 10.3389/fphar.2021.749628 (PMC8650591; doi:10.3389/fphar.2021.749628)
Supplement: Supplementary file 9 [file Table5.XLSX]

## Sheet: Table S5. enrichment.Process
#term ID	term description	strength	FDR-P
GO:0006108	malate metabolic process	2.63	0.0062
GO:2000778	positive regulation of interleukin-6 secretion	2.1	0.0216
GO:0006099	tricarboxylic acid cycle	2.1	0.0216
GO:0006101	citrate metabolic process	2.04	0.0216
GO:0061077	chaperone-mediated protein folding	1.75	0.0216
GO:0051702	interaction with symbiont	1.69	0.0216
GO:0050715	positive regulation of cytokine secretion	1.59	0.0173
GO:0046496	nicotinamide nucleotide metabolic process	1.53	0.0335
GO:0050821	protein stabilization	1.51	0.0216
GO:0016999	antibiotic metabolic process	1.5	0.0335
GO:0006733	oxidoreduction coenzyme metabolic process	1.47	0.0349
GO:0007596	blood coagulation	1.46	0.0354
GO:0017148	negative regulation of translation	1.45	0.0354
GO:0060359	response to ammonium ion	1.44	0.0354
GO:0010950	positive regulation of endopeptidase activity	1.36	0.0455
GO:0006091	generation of precursor metabolites and energy	1.22	0.0216
GO:0050708	regulation of protein secretion	1.19	0.0216
GO:0052548	regulation of endopeptidase activity	1.12	0.0305
GO:0007010	cytoskeleton organization	1.05	0.0061
GO:0017144	drug metabolic process	1.01	0.0391
GO:0010035	response to inorganic substance	1	0.0403
GO:0043900	regulation of multi-organism process	0.97	0.0462
GO:0009725	response to hormone	0.91	0.027
GO:0055114	oxidation-reduction process	0.88	0.032
GO:0051050	positive regulation of transport	0.84	0.0349
GO:0051049	regulation of transport	0.76	0.0216
GO:0071310	cellular response to organic substance	0.74	0.0216
GO:0010033	response to organic substance	0.67	0.0216
GO:0032879	regulation of localization	0.66	0.0216
GO:0006996	organelle organization	0.63	0.0216
GO:0065008	regulation of biological quality	0.6	0.0216
GO:0042221	response to chemical	0.58	0.0216
GO:0051239	regulation of multicellular organismal process	0.55	0.0468
GO:0006950	response to stress	0.55	0.0489
GO:0016043	cellular component organization	0.52	0.0216
GO:0051716	cellular response to stimulus	0.47	0.0216
GO:0050896	response to stimulus	0.41	0.0216
GO:0032501	multicellular organismal process	0.41	0.0335
